# Supplementary material for: Comprehensive analysis of transcriptomics and metabolomics to understand tail-suspension-induced myocardial injury in rat
Source: Front Cardiovasc Med. 2023 Jan 17;9:1074257. doi: 10.3389/fcvm.2022.1074257 (PMC9886666; doi:10.3389/fcvm.2022.1074257)
Supplement: Supplementary Table 3 — Kyoto Encyclopedia of Genes and Genomes (KEGG) pathway analysis was performed using the differential expressed metabolites (DEMs). [file Table_3.XLSX]

## Sheet: Sheet2
ID Annotation	Annotation	in set	set	in background	background	RichFactor	p-value	-lg(p-value)	FDR correction	Matching IDs	URL
rno04723	Retrograde endocannabinoid signaling	4	36	19	3244	0.210526	4.40129e-05	4.35642	0.00369708	C00025 C00157 C00350 C13856	https://www.genome.jp/kegg-bin/show_pathway?rno04723/rno:C00025%09red/rno:C00157%09red/rno:C00350%09blue/rno:C13856%09red
rno04068	FoxO signaling pathway	2	36	5	3244	0.4	0.00117276	2.93079	0.0293014	C00008 C00025	https://www.genome.jp/kegg-bin/show_pathway?rno04068/rno:C00008%09blue/rno:C00025%09red
rno00340	Histidine metabolism	4	36	47	3244	0.0851064	0.00162288	2.78971	0.0293014	C00025 C00049 C01152 C05570	https://www.genome.jp/kegg-bin/show_pathway?rno00340/rno:C00025%09red/rno:C00049%09red/rno:C01152%09red/rno:C05570%09red
rno05140	Leishmaniasis	2	36	6	3244	0.333333	0.00174686	2.75774	0.0293014	C00195 C02737	https://www.genome.jp/kegg-bin/show_pathway?rno05140/rno:C00195%09red/rno:C02737%09blue
rno00970	Aminoacyl-tRNA biosynthesis	4	36	52	3244	0.0769231	0.00236785	2.62565	0.0293014	C00025 C00047 C00049 C00152	https://www.genome.jp/kegg-bin/show_pathway?rno00970/rno:C00025%09red/rno:C00047%09red/rno:C00049%09red/rno:C00152%09red
rno00564	Glycerophospholipid metabolism	4	36	52	3244	0.0769231	0.00236785	2.62565	0.0293014	C00157 C00350 C02737 C04230	https://www.genome.jp/kegg-bin/show_pathway?rno00564/rno:C00157%09red/rno:C00350%09blue/rno:C02737%09blue/rno:C04230%09red
rno00600	Sphingolipid metabolism	3	36	25	3244	0.12	0.00244178	2.61229	0.0293014	C00195 C00550 C03640	https://www.genome.jp/kegg-bin/show_pathway?rno00600/rno:C00195%09red/rno:C00550%09red/rno:C03640%09red
rno00250	Alanine, aspartate and glutamate metabolism	3	36	28	3244	0.107143	0.00339938	2.4686	0.0316854	C00025 C00049 C00152	https://www.genome.jp/kegg-bin/show_pathway?rno00250/rno:C00025%09red/rno:C00049%09red/rno:C00152%09red
rno04974	Protein digestion and absorption	3	36	29	3244	0.103448	0.00376287	2.42448	0.0316854	C00025 C00047 C00049	https://www.genome.jp/kegg-bin/show_pathway?rno04974/rno:C00025%09red/rno:C00047%09red/rno:C00049%09red
rno04217	Necroptosis	2	36	9	3244	0.222222	0.00410542	2.38664	0.0316854	C00195 C00550	https://www.genome.jp/kegg-bin/show_pathway?rno04217/rno:C00195%09red/rno:C00550%09red
rno05230	Central carbon metabolism in cancer	3	36	30	3244	0.1	0.00414927	2.38203	0.0316854	C00025 C00049 C00152	https://www.genome.jp/kegg-bin/show_pathway?rno05230/rno:C00025%09red/rno:C00049%09red/rno:C00152%09red
rno05231	Choline metabolism in cancer	2	36	11	3244	0.181818	0.0061852	2.20865	0.0432964	C00157 C04230	https://www.genome.jp/kegg-bin/show_pathway?rno05231/rno:C00157%09red/rno:C04230%09red
rno05014	Amyotrophic lateral sclerosis	2	36	14	3244	0.142857	0.0100219	1.99905	0.0609836	C00008 C00025	https://www.genome.jp/kegg-bin/show_pathway?rno05014/rno:C00008%09blue/rno:C00025%09red
rno00330	Arginine and proline metabolism	4	36	78	3244	0.0512821	0.0101639	1.99294	0.0609836	C00025 C00300 C02305 C04281	https://www.genome.jp/kegg-bin/show_pathway?rno00330/rno:C00025%09red/rno:C00300%09red/rno:C02305%09red/rno:C04281%09red
rno04071	Sphingolipid signaling pathway	2	36	15	3244	0.133333	0.0114836	1.93992	0.064308	C00195 C00550	https://www.genome.jp/kegg-bin/show_pathway?rno04071/rno:C00195%09red/rno:C00550%09red
rno00053	Ascorbate and aldarate metabolism	3	36	49	3244	0.0612245	0.016302	1.78776	0.0850474	C01041 C01620 C04575	https://www.genome.jp/kegg-bin/show_pathway?rno00053/rno:C01041%09red/rno:C01620%09red/rno:C04575%09red
rno00260	Glycine, serine and threonine metabolism	3	36	50	3244	0.06	0.017212	1.76417	0.0850474	C00049 C00300 C02737	https://www.genome.jp/kegg-bin/show_pathway?rno00260/rno:C00049%09red/rno:C00300%09red/rno:C02737%09blue
rno00230	Purine metabolism	4	36	95	3244	0.0421053	0.0198473	1.7023	0.0887328	C00008 C00262 C00294 C00361	https://www.genome.jp/kegg-bin/show_pathway?rno00230/rno:C00008%09blue/rno:C00262%09red/rno:C00294%09red/rno:C00361%09blue
rno04931	Insulin resistance	2	36	20	3244	0.1	0.0200705	1.69744	0.0887328	C00195 C02571	https://www.genome.jp/kegg-bin/show_pathway?rno04931/rno:C00195%09red/rno:C02571%09red
rno04714	Thermogenesis	2	36	23	3244	0.0869565	0.0261758	1.5821	0.104703	C00008 C13856	https://www.genome.jp/kegg-bin/show_pathway?rno04714/rno:C00008%09blue/rno:C13856%09red
rno00220	Arginine biosynthesis	2	36	23	3244	0.0869565	0.0261758	1.5821	0.104703	C00025 C00049	https://www.genome.jp/kegg-bin/show_pathway?rno00220/rno:C00025%09red/rno:C00049%09red
rno04742	Taste transduction	2	36	25	3244	0.08	0.0306123	1.5141	0.11527	C00008 C00025	https://www.genome.jp/kegg-bin/show_pathway?rno04742/rno:C00008%09blue/rno:C00025%09red
rno04136	Autophagy - other	1	36	3	3244	0.333333	0.0329342	1.48235	0.11527	C00350	https://www.genome.jp/kegg-bin/show_pathway?rno04136/rno:C00350%09blue
rno05322	Systemic lupus erythematosus	1	36	3	3244	0.333333	0.0329342	1.48235	0.11527	C02737	https://www.genome.jp/kegg-bin/show_pathway?rno05322/rno:C02737%09blue
rno04142	Lysosome	1	36	4	3244	0.25	0.043676	1.35976	0.146752	C00008	https://www.genome.jp/kegg-bin/show_pathway?rno04142/rno:C00008%09blue
